# Supplementary material
Source: PubMed Central journal article supplement (PMC5278733)
Supplement: AAC.01866-16_zac002175916s1.pdf [file AAC.01866-16_zac002175916s1.pdf]

***Babesia duncani* Cytochrome *b* Gene**

1 TTAGTGAAGG AACTTGACAG GTATAAAAAT TTTTATATATA TTTGTTATAA AAATGAATTA  
61 GGATACAGGG CTATAACCAA CAAGTTAACA TTTGCATTTA ATATGATTAA ATCACATCTT  
121 ACAAACTATT TAGTACCAGA TAATATAAAT GGTAATTGGA ATTACGGATT CCTTTTGGCT  
181 ATGCTTTTAT TACTGCAGAT TTTCTCAGGA ATATTAGCTG CCACAATATA TTCTCCTTAT  
241 GGAGGAAATG CTTTTGAGAG CCTTCTAACA CTTTACGTTA GTAAAAATAT AGGATGGTTA  
301 GTCCGCTATT TTCACGCTGT ATGTGTTTCA ATTTACTTTT TGGTCATGTA TTTTCATGTC  
361 ACAAAAGGTT TGTCTTATTC TACAAGATAC ATCCCTTGGG TGTGGTATAC TGGATGGGCA  
421 ATTCTTGTCT TAAGTATTAT TATCGCATTC TTGGGTTATA CTCTTCCAAA CGGTCAGATG  
481 AGCTTTTGGG GAGCAACAGT TATATTAAAT TTATTTTATT GGGTTGGAGA CTTTGTGAGT  
541 CTTCTAATGG GAGGATTTAG TGTTGAATCA GAGACACTTG GTAGATTTTA TATTCTACAT  
601 TTTTCTCTTC CTTTTGTTTT ATTAATTCTT GTTCTTATAC ATATATTTTA CTTGCATGT  
661 CAAGGAAGTA CAAATCCTGT AATTAATCTT GACGCACTAT TAGGTGAGAG ATTTTGTGTA  
721 AATCCAGCAT TTTGCGATTT AAAATGCATA ATTATTTTAT TTGTTGGAAT TTCACTTCAA  
781 ATTGCATATG GAATACTGCC TATATTTCAA GGTGATCACG ACAATTCGAT CGAAGCAAAT  
841 AGCTCACAAA CTCCTGAACA TATTGTTCCCT GAGTGGTATT TACTTGTGTT TTATGCAGCA  
901 TTGAAATTAT GTCCTGGAAG ATTCGCAGGA CTATTAGCAA TGATTGCAAT TATGGAACCT  
961 CTGGTAATTT TATCAGAAGC TAGAGCTTTT GCTGCAATAG TATCATGTGC CGTCCATCAT  
1021 AGAAATTGGA CTACAGCACT TTCTGTGCGTA CTACCAGCCC TTTTATATATT GGGTTCATTA  
1081 GGACAAATTG CAATCAATTT GTATATCCTA AAGGTAGGTG CATATATAAT ATGTGCAGTC  
1141 ACTTGCTGTA TTACTAGACT GCTTGATCTA GCAATTATAG AAAGAGTCTA TTAA

***Babesia duncani* Cytochrome *b* Protein**

MVKELDRYKNFLYICYKNELGYRAITNKLTFAFNMIKSHLTNYLVPDNINGNWNWYGFLLA  
MLLLLQIFSGILAATIYSPYGGNAFESLLTLVSKNIGWLVRYFHAVCVSIYFLVMYFHV  
TKGLSYSTRYIPWMWYTGWAILVLSIIIAFLGYTLPNGQMSFWGATVILNLFYVWVDFVS  
LLMGGFSVESETLGRFYILHFSLPFVLLILVLIHIFYHLHCQGSTNPVINLDALLGERFLL  
NPAFCDLKCIILFVGISLQIAYGILPIFQGDHNSIEANSSQTPEHIVPEWYLLVFYAA  
LKLCPGKFAGLLAMIAIMELLVILSEARAFAAIVSCAVHHRNWTALSVVLPALFILGSL  
GQIAINLYILKVGAYIICAVTCCITRLLDLAIIERVY

**Fig S1. Nucleotide and Protein Sequence of *Babesia duncani* Cytochrome *b***

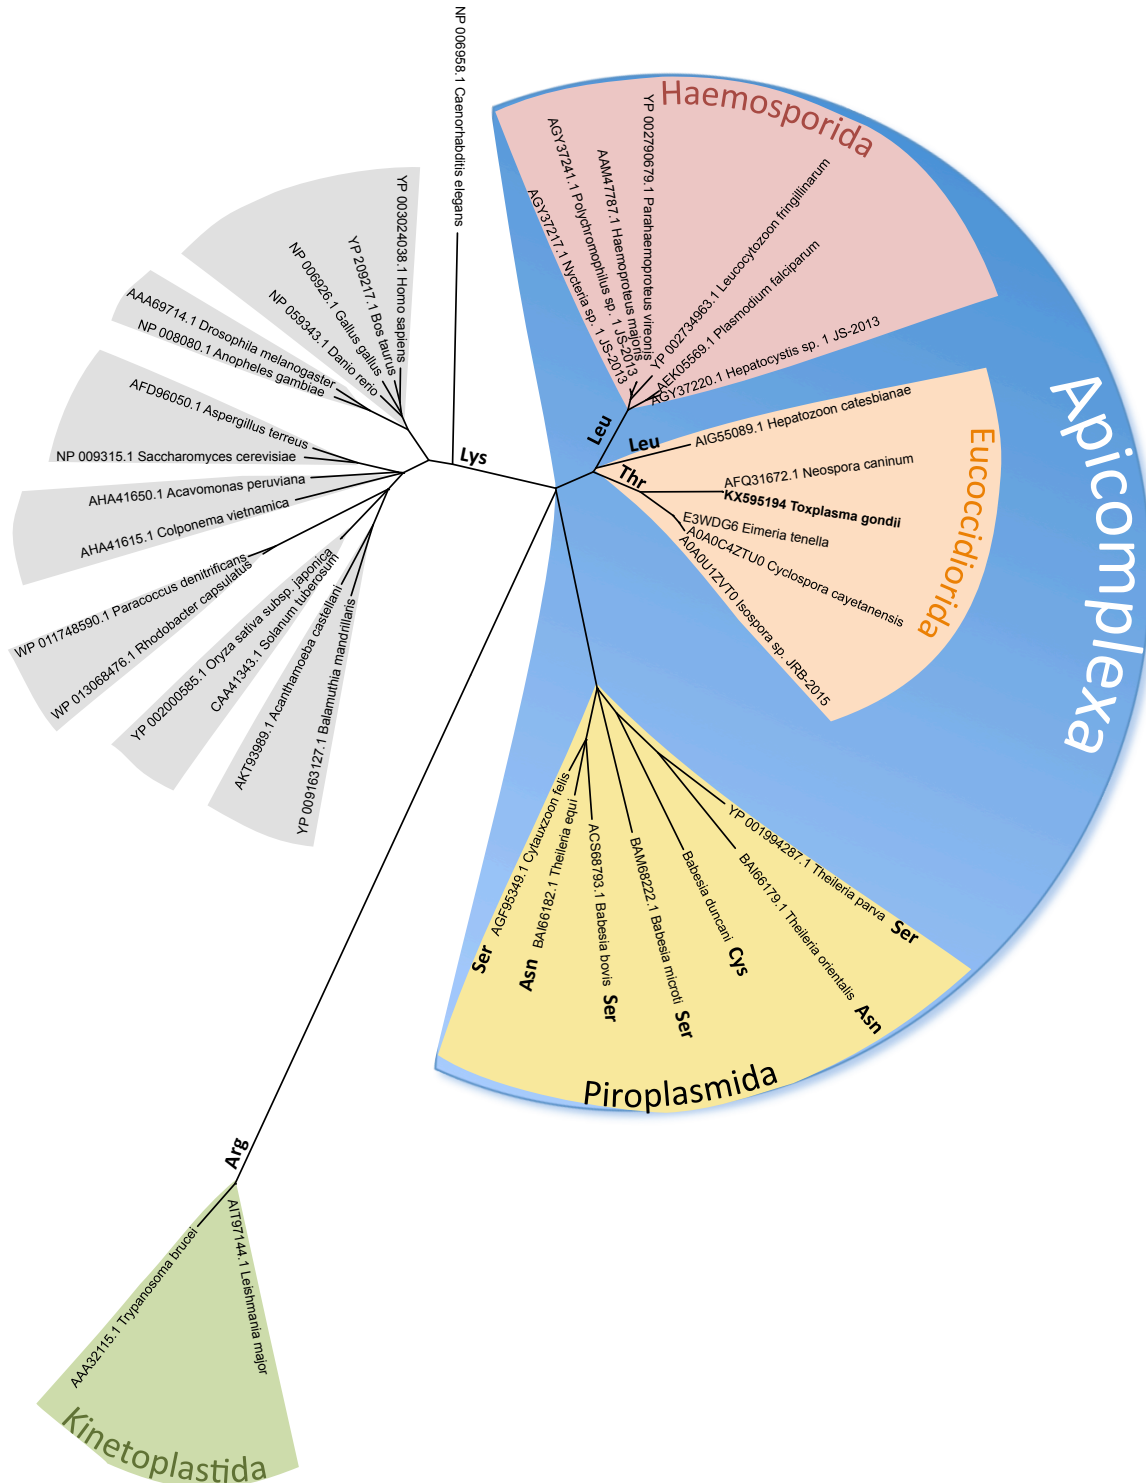

**Fig S2. Divergence of Amino Acid 222 among Apicomplexa Compared to a Broad Representative Sample of Cytochrome b Protein Sequences.**

Amino acid abbreviations indicate the amino acids that are analogous to *T. gondii* *Cytb* Thr222. Within the order Eucoccidiorida, the family Sarcocystidae, which includes *T. gondii*, and the family Eimeriidae possess a threonine at *T. gondii* position 222. *Hepatozoon catesbianae* possesses a leucine like the Haemosporida. The Piroplasmida demonstrate further diversity in that *Babesia* species have a serine or cysteine, while *Theileria* species have either serine or asparagine. Outside of the Apicomplexa, the vast majority of *Cytb* sequences, including non-apicomplexan Alveolata, contain a lysine residue. The highly divergent *Cytb* of kinetoplastids have an arginine similar to lysine. Phylogenetic analysis of *Cytb* was performed by the Maximum Likelihood method using MEGA7 as noted in the methods.
